# Supplementary material
Source: Springer Nature journal article supplement (https://www.springermedizin.de/resource/supplementary/12933_2010_278_MOESM2_ESM.pdf/9540002)

## Upper: Clinical model

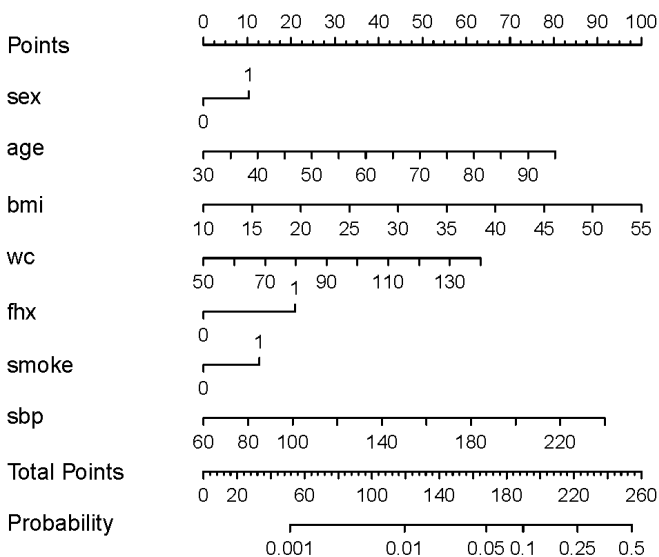

## Lower: Biochemical model

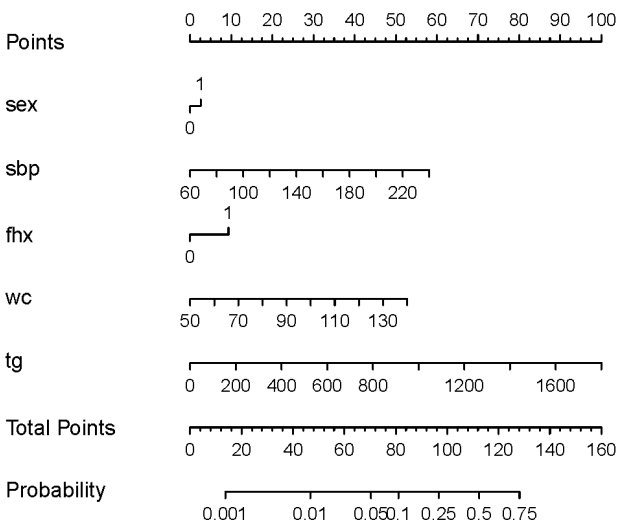

Supplement: MOESM2 [file 9540002]
